# Supplementary material
Source: PubMed Central journal article supplement (PMC2080754)
Supplement: thorax_61_suppl-1_i1__2.pdf [file thorax_61_suppl-1_i1__2.pdf]

## Appendix 2: Protocol for the evaluation of chronic cough in an adult

### Part 2: Boxes 1–4

#### Box 1 Symptoms suggesting potential aggravants<sup>1</sup>

|                                                                                        |                                                                                                                             |
|----------------------------------------------------------------------------------------|-----------------------------------------------------------------------------------------------------------------------------|
| Asthma                                                                                 | nocturnal cough, wheezing, exercise, aerosols                                                                               |
| Upper airway disorders                                                                 | nasal discharge, previous sinusitis                                                                                         |
| GORD                                                                                   | cough worse with or after meals, stooping –<br>cough on phonation, dysphonia, dyspepsia,<br>abatement of cough during sleep |
| Environment                                                                            | cough associated with work/specific<br>environmental irritant                                                               |
| Recommendation: Trial of therapy directed at potential aggravants; aggravant avoidance |                                                                                                                             |

#### Box 2 Assessing treatment response

| Outcome measure                                                                            | Minimum significant change |
|--------------------------------------------------------------------------------------------|----------------------------|
| Cough visual analogue scale (VAS) <sup>2</sup> (no cough: 0♣mm – worst cough ever: 100♣mm) | 15♣mm                      |
| Leicester Cough Questionnaire (LCQ) <sup>2</sup> (range 3 – 21)                            | 1.8                        |
| Capsaicin challenge <sup>3</sup>                                                           |                            |
| C2: concentration of capsaicin causing 2 coughs                                            | 2.0 doubling doses         |
| C <sub>5</sub> : concentration of capsaicin causing 5 coughs                               | 3.2 doubling doses         |

### Box 3 Diagnostic testing

| Investigation                                              | Comment                                                                                                                                             |
|------------------------------------------------------------|-----------------------------------------------------------------------------------------------------------------------------------------------------|
| Bronchial provocation testing<br>(methacholine, histamine) | A positive test supports a diagnosis of asthma<br>but cough may be steroid responsive even if<br>negative                                           |
| Induced sputum analysis                                    | May identify an eosinophilic bronchitis:<br>indicated in patients with negative bronchial<br>provocation test                                       |
| 24 h ambulatory oesophageal pH testing                     | To assess acid reflux severity and any temporal<br>association with cough: indicated for patients<br>without reflux symptoms and pre fundoplication |
| Oesophageal manometry                                      | Indicates oesophageal dysmotility                                                                                                                   |
| Sinus radiograph/CT scan sinuses                           | Indicated for patients with suggestive history but<br>normal ENT examination                                                                        |

### Box 4 Additional investigations

| Investigation                  | Comment                                                                                    |
|--------------------------------|--------------------------------------------------------------------------------------------|
| High resolution CT scan thorax | May identify abnormalities not apparent on<br>chest radiograph but diagnostic yield is low |

| Investigation                                    | Comment                                                                                                                                   |
|--------------------------------------------------|-------------------------------------------------------------------------------------------------------------------------------------------|
| Fibreoptic bronchoscopy <sup>4</sup>             | High index of suspicion of inhaled foreign body.<br><br>Clinical utility may be improved in patients with the more common causes excluded |
| Psychiatric appraisal                            | Only consider after thorough exclusion of physical cause                                                                                  |
| Non invasive cardiac studies<br>(Echocardiogram) | Consider early in protocol only if suggestive clinical features                                                                           |

## References

1. McGarvey LP, Heaney LG, Lawson JT, *et al.* Evaluation and outcome of patients with chronic non-productive cough using a comprehensive diagnostic protocol.[see comment]. *Thorax* 1998;**53**:738–43.
2. Birring SS, Prudon B, Carr AJ, *et al.* Development of a symptom specific health status measure for patients with chronic cough: Leicester Cough Questionnaire (LCQ). *Thorax* 2003;**58**:339–43.
3. Prudon B, Vara DD, Pavord ID, *et al.* Analysis of cough reflex sensitivity data. *Thorax* 2005;**60**:ii53–120 (Abstract).
4. Sen RP, Walsh TE. Fiberoptic bronchoscopy for refractory cough. *Chest* 1991;**99**:33–5.
