# Supplementary material
Source: PubMed Central journal article supplement (PMC2080754)

Appendix 2: Protocol for the evaluation of chronic cough in an adult (Part 1)

Boxes 1-4 are shown in Part 2

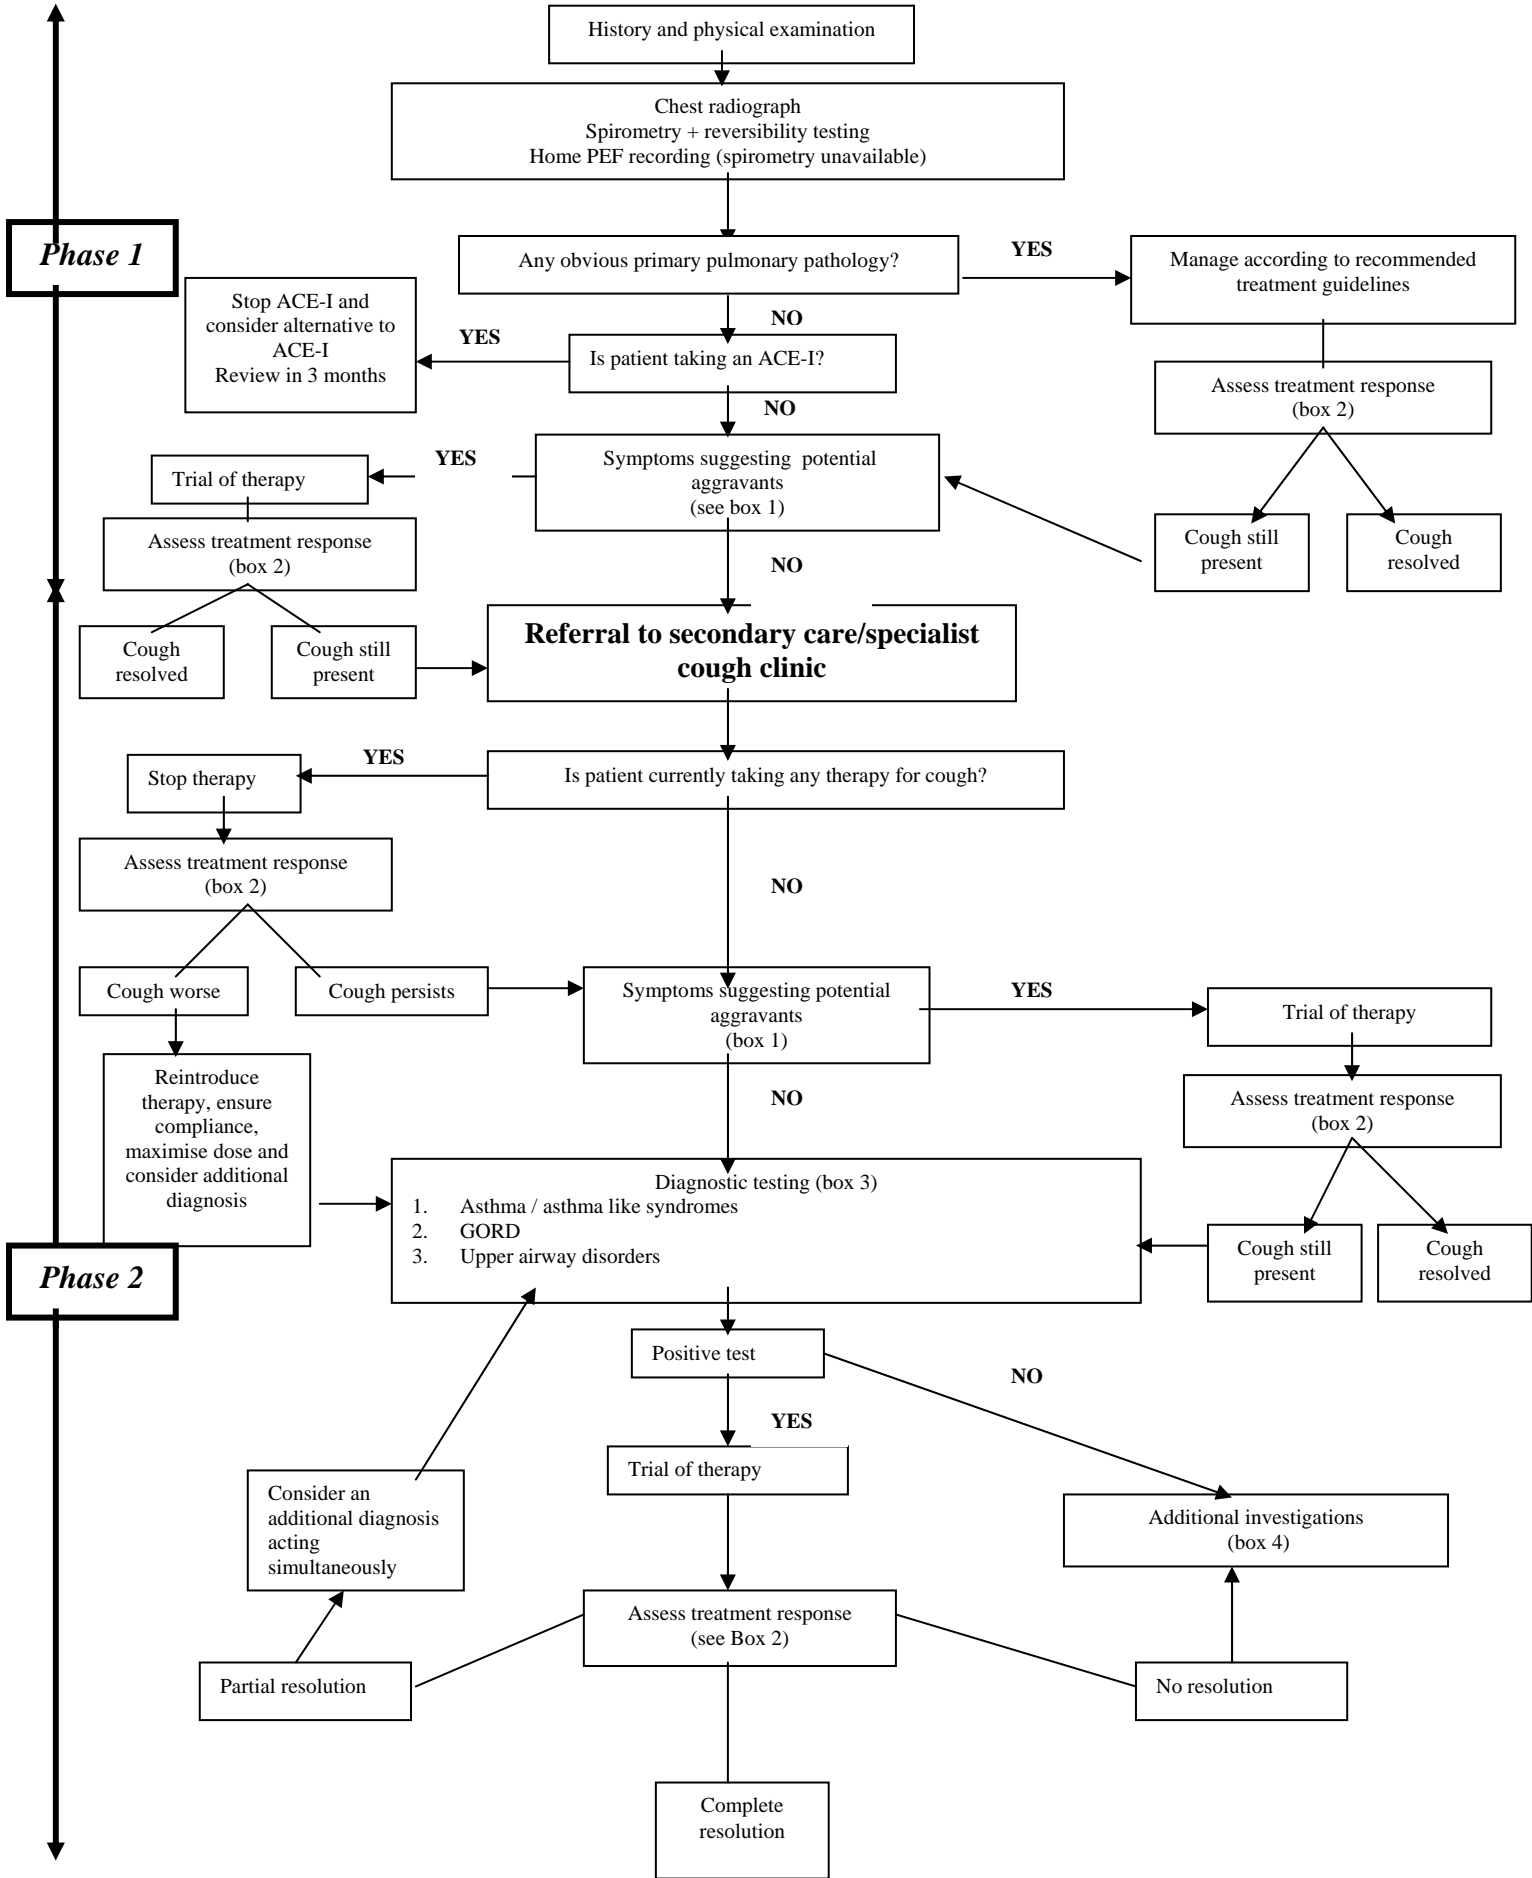

Supplement: thorax_61_suppl-1_i1__1.pdf [file thorax_61_suppl-1_i1__1.pdf]
